# Supplementary material for: Social Risk, Social Need, and Use of the Emergency Department
Source: PubMed Central journal article supplement (PMC10799261; doi:10.1001/jamanetworkopen.2023.52365), 2024-01-19
Supplement: jamanetwopen-e2352365-s001.pdf [file jamanetwopen-e2352365-s001.pdf]

## Supplementary Online Content

Mayes KD, Cash RE, Schiavoni KH, et al. Social risk, social need, and use of the emergency department. *JAMA Netw Open*. 2024;6(1):e2352365.  
doi:10.1001/jamanetworkopen.2023.52365

**eAppendix.** Adverse Social Determinants of Health Institutional Screening Questionnaire

This supplementary material has been provided by the authors to give readers additional information about their work.

**eAppendix.** Adverse Social Determinants of Health Institutional Screening Questionnaire

**Within the past 12 months we were worried whether our food would run out before we got money to buy more.**

- Never True
- Sometimes True
- Often True

**Within the past 12 months the food we bought just didn't last and we didn't have money to get more.**

- Never True
- Sometimes True
- Often True

**What is your housing situation today?**

- I do not have housing (staying with others, in a hotel, living outside on the street, on a bench, in a car, or in a park)
- I have housing
- I choose not to answer

**How many times have you moved in the past 12 months?**

- Three or more times
- Two times
- One time
- Zero (I did not move)
- I choose not to answer

**Are you worried that in the next 2 months, you may not have your own housing to live in?**

- Yes
- No
- I chose not to answer

**Do you have trouble paying your heating or electricity bill?**

- Yes
- No
- I chose not to answer

**Do you have trouble paying for medications?**

- Yes
- No
- I chose not to answer

**Are you currently unemployed and looking for work?**

- Yes
- No
- I chose not to answer

**Do you have trouble with childcare or the care of a family member?**

- Yes
- No
- I chose not to answer

**Would you like information today about any of the following topics?**

- Transportation
- Food
- Housing
- Paying utility bills
- Paying for medications
- Job search or training
- Education
- Childcare
- Care for elder or disabled

**In the last 12 months, have you received assistance from an organization or program to help you with any of the following:**

- Transportation
- Food
- Housing

- Paying utility bills
- Education

- Paying for medications
- Childcare

- Job search or training
- Care for elder or disabled
