# Supplementary material for: Social Risk, Social Need, and Use of the Emergency Department
Source: PubMed Central journal article supplement (PMC10799261; doi:10.1001/jamanetworkopen.2023.52365), 2024-01-19
Supplement: jamanetwopen-e2352365-s002.pdf [file jamanetwopen-e2352365-s002.pdf]

## **Data Sharing Statement**

Mayes. Social Risk, Social Need, and Use of the Emergency Department. *JAMA Netw Open*.  
Published January 19, 2024. doi:10.1001/jamanetworkopen.2023.52365

### **Data**

**Data available:** No
